# Supplementary material for: The impact of a named GP scheme on continuity of care and emergency hospital admission: a cohort study among older patients in England, 2012–2016
Source: PubMed Central journal article supplement (PMC6773345; doi:10.1136/bmjopen-2019-029103), 2019-09-23
Supplement: bmjopen-2019-029103supp001.pdf [file bmjopen-2019-029103supp001.pdf]

## Supplement

Supplementary Figure 1: Distribution of date when patients aged 75 and older were notified of named GP (n=12,526).

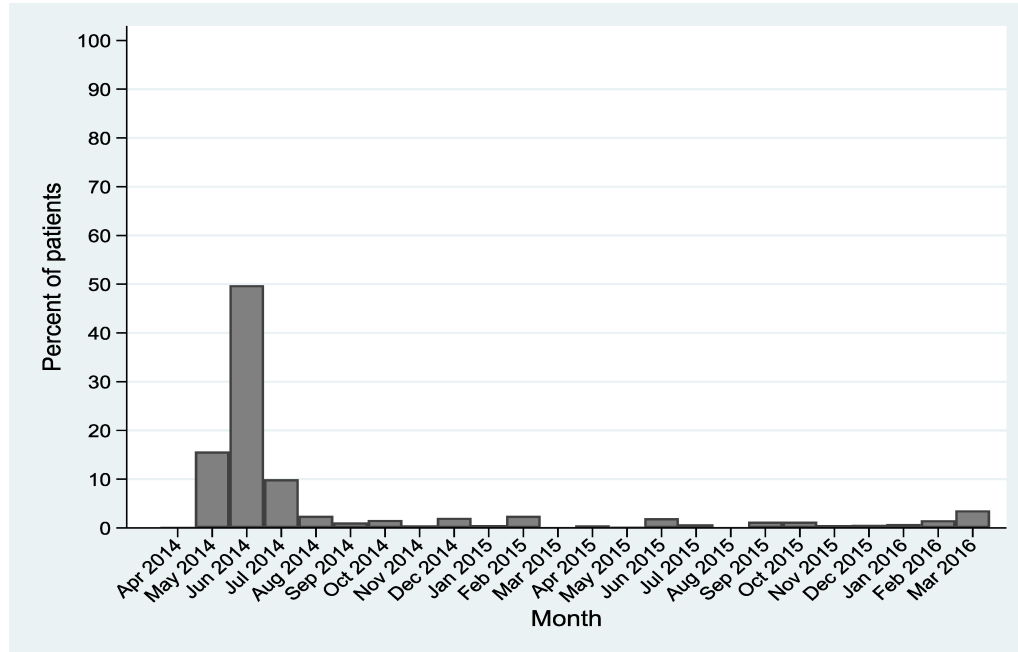

Supplementary Figure 2: Distribution of change in BB index-score between 2012-14 and 2014-16 for patients aged 65-70 (N=9,502) and 75 or older (N=8,409).

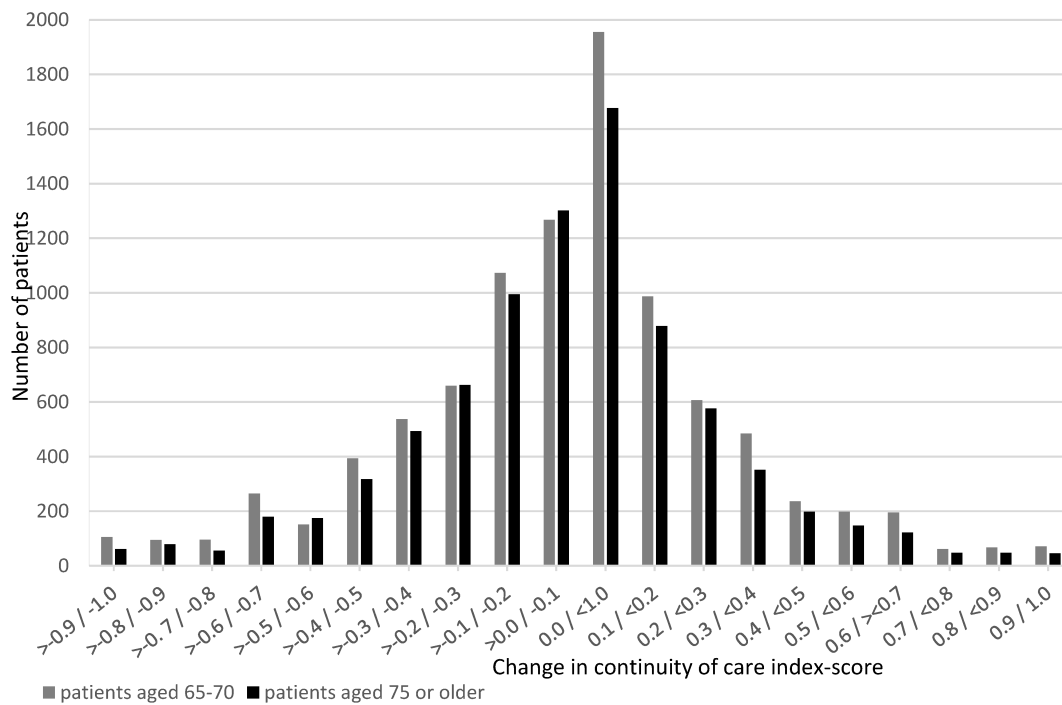

Supplementary Table 1: Cross-tabulation of continuity of care (using Bice & Boxerman index-scores) and number of GP consultations in England between 2012 and 2016 (38,500 observations).

| CoC (BB index) | Number of GP consultations (%) |              |              |              |                |
|----------------|--------------------------------|--------------|--------------|--------------|----------------|
|                | 2-5                            | 6-9          | 10-15        | 16+          |                |
| Lowest CoC     | 3,941 (40.8)                   | 1,946 (20.2) | 1,869 (19.4) | 1,896 (19.6) | 9,652 (100.0)  |
| CoC Qr2        | 1,454(15.6)                    | 2,417 (25.9) | 2,456 (26.3) | 3,017 (32.3) | 9,344 (100.0)  |
| CoC Qr3        | 2,036 (20.7)                   | 2,361 (24.0) | 2,566 (26.0) | 2,889 (29.3) | 9,852 (100.0)  |
| Highest CoC    | 3,032 (31.4)                   | 2,441 (25.3) | 2,172 (22.5) | 2,007 (20.8) | 9,652 (100.0)  |
| Total          | 10,463 (27.2)                  | 9,165 (23.8) | 9,063 (23.5) | 9,809 (25.5) | 38,500 (100.0) |

CoC=continuity of care, Qr=quartile, BB=Bice & Boxerman

Supplementary Table 2: Estimates of B-coefficients from multi-level regression (normal response) model for the association between introduction of named-GP and continuity of care (Bice & Boxerman index-score), England 2012-2016 (38,500 observations), adjusted for standardised covariates.

|                                                         | Coef.  | 95% CI         | p-value |
|---------------------------------------------------------|--------|----------------|---------|
| Constant                                                | 0.427  | 0.404; 0.449   | <0.001  |
| Period (ref.=pre)                                       | -0.024 | -0.030; -0.017 | <0.001  |
| Age (ref.= 75-)                                         | 0.017  | 0.009; 0.025   | <0.001  |
| Period * Age                                            | -0.005 | -0.014; 0.005  | 0.344   |
| Female (ref.=male)                                      | -0.007 | -0.010; -0.004 | <0.001  |
| Number of chronic morbidities <sup>1</sup>              | -0.006 | -0.009; -0.003 | <0.001  |
| Deprivation level Qn2 (ref.= Qn1-Least deprived)        | 0.001  | -0.003; 0.005  | 0.503   |
| Deprivation level Qn3 (ref.= Qn1-Least deprived)        | -0.001 | -0.006; 0.003  | 0.490   |
| Deprivation level Qn4 (ref.= Qn1-Least deprived)        | -0.003 | -0.007; 0.001  | 0.142   |
| Deprivation level Qn5 (ref.= Qn1-Least deprived)        | -0.003 | -0.007; 0.000  | 0.085   |
| Number of GP consultations Qr2 (ref.=Qr1-lowest number) | 0.002  | -0.001; 0.005  | 0.255   |
| Number of GP consultations Qr3 (ref.=Qr1-lowest number) | -0.001 | -0.004; 0.003  | 0.716   |
| Number of GP consultations Qr4 (ref.=Qr1-lowest number) | -0.004 | -0.007; -0.000 | 0.051   |
| Number of GPs in practice Qr2 (ref.=Qr1-lowest number)  | -0.037 | -0.046; -0.028 | <0.001  |
| Number of GPs in practice Qr3 (ref.=Qr1-lowest number)  | -0.050 | -0.061; -0.040 | <0.001  |
| Number of GPs in practice Qr4 (ref.=Qr1-lowest number)  | -0.069 | -0.081; -0.057 | <0.001  |
| Cities and towns (ref.=urban conurbation)               | 0.023  | -0.009; 0.055  | 0.152   |
| Rural (ref.=urban conurbation)                          | -0.017 | -0.051; 0.018  | 0.342   |
| Practice-level variance (constant)                      | 0.017  | 0.013; 0.021   |         |
| Patient-level variance (constant)                       | 0.017  | 0.016; 0.018   |         |
| Period-level variance (constant)                        | 0.053  | 0.052; 0.054   |         |
| intraclass correlation coefficient (ICC)                | 0.195  |                |         |

<sup>1</sup> Diagnosed with one or more of the following seven chronic conditions: chronic renal disease, cancer, asthma, stroke, coronary heart disease, diabetes, or COPD. Ref.= reference; Qn=quintile; Qr=quartile.

Supplementary Table 3: Estimates of B-coefficients from multi-level regression (binomial logit) model for the association between introduction of named GP and risk of an emergency hospital admissions, England 2012-2016 (38,500 observations), adjusted for standardised covariates.

|                                                        | Coef.  | 95% CI         | p-value |
|--------------------------------------------------------|--------|----------------|---------|
| Constant                                               | -2.019 | -2.088; -1.951 | <0.001  |
| Period (ref.=pre)                                      | 0.145  | 0.062; 0.229   | 0.001   |
| Age (ref.= 75-)                                        | 0.466  | 0.381; 0.551   | <0.001  |
| Period * Age                                           | 0.175  | 0.064; 0.285   | 0.002   |
| Female (ref.=male)                                     | -0.028 | -0.057; 0.002  | 0.066   |
| Number of chronic morbidities <sup>1</sup>             | 0.465  | 0.438; 0.492   | <0.001  |
| Deprivation level Qn2 (ref.= Qn1-Least deprived)       | 0.304  | -0.007; 0.068  | 0.109   |
| Deprivation level Qn3 (ref.= Qn1-Least deprived)       | 0.054  | 0.016; 0.92    | 0.005   |
| Deprivation level Qn4 (ref.= Qn1-Least deprived)       | 0.065  | 0.029; 0.102   | <0.001  |
| Deprivation level Qn5 (ref.= Qn1-Least deprived)       | 0.083  | 0.049; 0.117   | <0.001  |
| Number of GPs in practice Qr2 (ref.=Qr1-lowest number) | -0.008 | -0.056; 0.040  | 0.750   |
| Number of GPs in practice Qr3 (ref.=Qr1-lowest number) | -0.004 | -0.054; 0.047  | 0.887   |
| Number of GPs in practice Qr4 (ref.=Qr1-lowest number) | 0.001  | -0.053; 0.055  | 0.974   |
| Cities and towns (ref.=urban conurbation)              | -0.061 | -0.119; -0.003 | 0.039   |
| Rural (ref.=urban conurbation)                         | -0.022 | -0.083; 0.039  | 0.482   |
| Practice-level variance (constant)                     | 0.020  | 0.008; 0.033   |         |
| Patient-level variance (constant)                      | 0.548  | 0.465; 0.632   |         |
| Intraclass correlation coefficient (ICC)               | 0.035  |                |         |

<sup>1</sup> Diagnosed with one or more of the following seven chronic conditions: chronic renal disease, cancer, asthma, stroke, coronary heart disease, diabetes, or COPD. Ref.= reference; Qn=quintile; Qr=quartile.

Note: the ratio of odds ratios for patients aged 75 and over was 1.19 compared with those under 75; this is calculated by taking e raised to the power of 0.175.

Supplementary Table 4: Estimates of B-coefficients from multi-level regression (Poisson) model for the association between introduction of named GP and the number of emergency hospital admissions, England 2012-2016 (38,500 observations), adjusted for standardised covariates.

|                                                        | Coef.  | 95% CI         | p-value |
|--------------------------------------------------------|--------|----------------|---------|
| Constant                                               | -1.868 | -1.927; -1.808 | <0.001  |
| Period (ref.=pre)                                      | 0.164  | 0.098; 0.230   | <0.001  |
| Age (ref.= 75-)                                        | 0.452  | 0.380; 0.525   | <0.001  |
| Period * Age                                           | 0.134  | 0.051; 0.217   | 0.001   |
| Female (ref.=male)                                     | -0.024 | -0.051; 0.003  | 0.087   |
| Number of chronic morbidities <sup>1</sup>             | 0.428  | 0.403; 0.452   | <0.001  |
| Deprivation level Qn2 (ref.= Qn1-Least deprived)       | 0.036  | 0.002; 0.070   | 0.041   |
| Deprivation level Qn3 (ref.= Qn1-Least deprived)       | 0.056  | 0.021; 0.091   | 0.002   |
| Deprivation level Qn4 (ref.= Qn1-Least deprived)       | 0.070  | 0.037; 0.103   | <0.001  |
| Deprivation level Qn5 (ref.= Qn1-Least deprived)       | 0.086  | 0.055; 0.117   | <0.001  |
| Number of GPs in practice Qr2 (ref.=Qr1-lowest number) | 0.004  | -0.037; 0.045  | 0.845   |
| Number of GPs in practice Qr3 (ref.=Qr1-lowest number) | 0.014  | -0.029; 0.058  | 0.525   |
| Number of GPs in practice Qr4 (ref.=Qr1-lowest number) | 0.004  | -0.043; 0.050  | 0.887   |
| Cities and towns (ref.=urban conurbation)              | -0.058 | -0.110; -0.006 | 0.028   |
| Rural (ref.=urban conurbation)                         | -0.021 | -0.076; 0.034  | 0.458   |
| Practice-level variance (constant)                     | 0.015  | 0.005; 0.025   |         |
| Patient-level variance (constant)                      | 1.511  | 1.440; 1.582   |         |
| Intraclass correlation coefficient (ICC)               | 0.010  |                |         |

<sup>1</sup> Diagnosed with one or more of the following seven chronic conditions: chronic renal disease, cancer, asthma, stroke, coronary heart disease, diabetes, or COPD. Ref.= reference; Qn=quintile; Qr=quartile.

Note: the ratio of rate ratios for patients aged 75 and over was 1.14 compared with those under 75; this is calculated by taking e raised to the power of 0.134.
